# Supplementary material for: Method-oriented systematic review on the simple scale for acceptance measurement in advanced transport telematics
Source: PLoS One. 2021 Mar 25;16(3):e0248107. doi: 10.1371/journal.pone.0248107 (PMC7993792; doi:10.1371/journal.pone.0248107)
Supplement: S1 Dataset — (XLSX) [file pone.0248107.s005.xlsx]

## Sheet: Data
Authors	Publication year	Study title	Geographical setting	Institutional link	Article type	Included in qualitative synthesis	Team member
Adell, E.	2009	Driver Experience and Acceptance of Driver Support Systems - A Case of Speed Adaptation	Sweden	Dept. of Technology and Society Lund University	Doctorate or graduate thesis		JZ
Adell, E.; Várhelyi, A.	2006	Developement of HMI components for a driver assistance system for safe speed and safe distance	Sweden	Dept. of Technology and Society Lund University	Conference proceedings		JZ
Adell, E.; Várhelyi, A.; Alonso, M.; Plaza, J.	2008	Developing human-machine interaction components for a driver assistance system for safe speed and safe distance	Spain, Sweden	Dept. of Technology and Society, Lund University; Fundacion CIDAUT, Parque Technologico de Boecillo	Peer review journal	Yes	LP, JZ
Adell, E.; Várhelyi, A.; dalla Fontana, M.	2011	The effects of a driver assistance system for safe speed and safe distance- A real-life field study	Italy	Dept. of Technology and Society, Lund University, Sweden Universita di Trento, Italy	Peer review journal	Yes	JZ, LK
Adell, E.; Várhelyi, A.; dalla Fontana, M.; Bruel, L.	2008	Test of HMI Alternatives for Driver Support to Keep Safe Speed and Safe Distance - A Simulator Study	France	Dept. of Technology and Society Lund University Sweden Università di Trento; PSA Peugeot Citroen, Italy Velizy Viallacoublay, Cédex, France	Peer review journal	Yes	JZ, LK
Adell, E.; Várhelyi, A.; Hjälmdahl, M.	2008	Auditory and haptic systems for in-car speed management - A comparative real life study	Hungary, Spain	Dept. of Technology and Society, Lund University	Peer review journal	Yes	JZ, LK
Albert, M.; Lange, A.; Schmidt, A.; Wimmer, M.; Bengler, K.	2015	Automated driving - Assessment of interaction concepts under real driving conditions	Germany	Institute of Ergonomics, TU München; Carmeq GmbH, Ingolstadt; AUDI AG, Ingolstadt	Conference proceedings	Yes	LP, JZ
Altendorf, E.; Schreck, C.; Flemisch, F.	2017	A New Method and Results for Analyzing Decision-Making Provesses in Automated Driving on Highways	Germany	RWTH Aachen University; Fraunhofer FKIE	Monograph, book, book chapter		JZ
Ando, R. & Li, A.	2012	An Analysis on Users’ Evaluation for Self-balancing Two-wheeled Personal Mobility Vehicles*	Japan	Toyota Transportation Research Institute, Aichi, Japan Urban Transport Center, Ministry of Housing and Urban-Rural Development, China	Conference proceedings		JZ
Ando, R.; Li, A.; Nishihori, Y.; Kachi, N.	2013	Acceptability of Personal Mobility Vehicles to Public in Japan: Results of Social Trial in Toyota City	Japan	Toyota Transportation Research Institute, Aichi, Japan Urban Transport Center, Ministry of Housing and Urban-Rural Development, China Chuo Fukken Consultants, Nagoya, Japan	Monograph, book, book chapter		JZ
Arndt, S.	2011	Evaluierung der Akzeptanz von Fahrerassistenzsystemen. Modell vom Kaufverhalten von Endkunden	Germany	Traffic psychology, TU Dresden	Doctorate or graduate thesis		JZ
Bastiaensen, E.G.H.J.; Hoedemaker, M.; Zwaneveld, P.J.	2000	A Dutch database on automated vehicle guidance	Netherlands	Ministry of Transport, Public Works and Water Management, AVV Transport Research Centre; TNO Human Factors, Soesterberg; TNO Inro, Delft	Report		LK, JZ
Bazilinskyy, P.; Eriksson, A.; Petermeijer, B.; De Winter, J.	2017	Usefulness and satisfaction of take-over requests for highly automated driving	Netherlands	Department of Biomechanical Engineering, Delft University of Technology Transportation Research Group, Faculty of Engineering and Environment, University of Southampton Lehrstuhl für Ergonomie, Fakultät für Maschinenwesen, Technische Universität München	Conference proceedings		JZ
Bazilinskyy, P.; Stapel; J.; de Koning, C.; Lingmont, H.; de Lint, T.; van der Sijs, T.; van den Ouden, F.; Anema, F.; de Winter, J.	2017	Graded auditory feedback based on headway: An on-road pilot study	Netherlands	Delft University of Technology; SD-Insights	Conference proceedings		JZ
Bedi, P.; Agarwal, S.K.	2012	A Situation-Aware Proactive Recommender System	India	Dept of Computer Science, University of Delhi	Conference proceedings		JZ
Beggiato, M.; Krems, J.	2013	The evolution of mental model, trust and acceptance of adaptive cruise control in relation to initial information	Germany	Cognitive and Engineering Psychology, TU Chemnitz	Peer review journal	Yes	JZ, LP
Beggiato, M.; Pereira, M.; Petzoldt, T.; Krems, J.	2015	Learning and developement of trust, acceptance and the mental model of ACC. A longitudinal on-road study	Germany	Cognitive and Engineering Psychology, TU Chemnitz	Peer review journal	Yes	JZ, LP
Bekiaris, E.D.; Gemou, M.B.; Tzovaras, D.K.	2010	An Evaluation Study of a Holistic Dangerous Goods Cooperative System	Greece	Hellenic Institute of Transport, Centre for Research and Technology Hellas; Informatics and Telematics Institute, Centre for Research and Technology Hellas	Conference proceedings		JZ
Belotti, F.; de Gloria, A.; Montanari, R.; Dosio, N.; Morreake, D.	2005	COMUNICAR: designing a multimedia, context-aware human-machine interface for cars	Italy, Sweden	Dept of Electronics and Biophysical Engineering, University of Genova; Dept of Sciences and Methods of Engineering, University of Modena and Reggio Emilia; FIAT Research Center, Orbassano	Peer review journal	Yes	JZ, LP
Björk, H.; Hagemann, A.	2005	To start this vehicle, please verify yourself. Security and privacy, where shall we draw the line?	Sweden	Cognitive Science Program, Linköping University	Doctorate or graduate thesis		JZ
Black, D.; Unger, M.; Fischer, N.; Kikinis, R.; Hahn, H.; Neumuth, T.; Glaser, B.	2017	Auditory display as feedback for a novel eye-tracking system for sterile operating room interaction	Germany*	Medical Image Computing, University of Bremen; Jacobs University, Bremen; Fraunhofer MEVIS, Bremen; Innovation Center Computer Assisted Surgery, Leipzig; Leipzig University of Applied Sciences	Peer review journal	Yes	JZ, LK
Blömacher, K.; Nöcker, G.; Huff, M.	2018	The role of system description for conditionally automated vehicles	Germany*	Daimler AG, Active Safety Driver Assistance Systems, Sindelfingen; German Research Institute for Adult Education, Department of Research Infrastructures, Bonn	Peer review journal	Yes	JZ, LP
Breugelmans, J.; Lin, Y.	2011	Monitoring Driver States in an Adaptive Approach to In-Vehicle Risk-Level Communication	USA	Mechanical and Industrial Engineering Dept, Northeastern University	Conference proceedings		JZ
Breugelmans, J.; Lin, Y.; Cai, H.	2009	Incorporating operator states in driver assistance systems control	Netherlands*	Industrial Engineering and Innovation Sciences Department Eindhoven University of Technology Mechanical and Industrial Engineering Department, Northeastern University, Boston	Conference proceedings	Yes	JZ
Brookhuis, K.; de Waard, D. (S.203 bei De Waard 1997)	1997	Intelligent Speed Adaptor (ISA)	Netherlands	Centre for Environmental and Traffic Psychology, University of Groningen	Conference proceedings		JZ
Brookhuis, K.; de Waard, D.	1999	Limiting speed, towards an intelligent speed adaptar (ISA)	Netherlands	Centre for Environmental and Traffic Psychology, University of Groningen	Peer review journal	Yes	JZ
Brookhuis, K.A.; de Waard, D.	2006	Consequences of automation for driver behaviour and acceptance	Netherlands	Delft University of Technology, Transport Policy; Dept of Psychology, University of Groningen	Conference proceedings		LK, LP, JZ
Brookhuis, K.A.; Dicke, M.	2009	The effects of travel information presentation through nomadic systems on driver behaviour	Netherlands	Experimental & Work Psychology, University of Groningen; Delft University of Technology; Goudappel Coffeng, BV, Deventer	Peer review journal	Yes	LK, JZ
Brookhuis, K. A.; van Driel, C. J. G.; Hof, T.; van Arem, B.; Hoedemaeker, M.	2009	Driving with a congestion assistant; mental workload and acceptance	Netherlands	University of Groningen; University of Twente; TNO Human Factors, Soesterberg	Peer review journal	Yes	JZ, LP
Brouwer, R.F.T.; Hoedemaker, D.M (Eds.)	2006	Book title: Driver support and information systems: Experiments on learning, appropriation and effects of adaptiveness	Netherlands	TNO Human Factors, Soesterberg	Report		LK, JZ
Brouwer, R.F.T.; Hoedemaker, M.; Neerincx, M.A.	2009	Adaptive Interfaced in Driving	Netherlands	TNO Human Factors, Soesterberg; Delft University of Technology	Conference proceedings		JZ
Bueno, M.; Fabrigoule, C.; Ndiaye, D.; Fort, A.	2014	Behavioural adaptation and effectiveness of a Forward Collision Warning System depending on a secondary cognitive task	France*	IFSTTAR-TS2-LESCOT, Bron; University of Lyon; University of Bordeaux Segalen; University of Paris-Est	Peer review journal	Yes	LP, JZ
Bühler, F.; Cocron, P.; Neumann, I.; Franke, T.; Krems, J. F.	2014	Is EV experience related to EV acceptance? Results from a German field study	Germany	Cognitive & Engineering Psychology, TU Chemnitz	Peer review journal	Yes	LP, JZ
Bühler, F.; Neumann, I.; Cocron, P.; Franke, T.; Krems, J. F.	2010	Usage patterns of electric vehicles: A reliable indicator of acceptance? Findings from a German field study	Germany	Cognitive & Engineering Psychology, TU Chemnitz	Conference proceedings		JZ
Bühler, F.; Franke, T.; Cocron, P.; Schleinitz, K.; Neumann, I.; Ischebeck, M.; Krems, J.F.	2013	Driving an EV with no opportunity to charge at home - is this acceptable?	Germany	TU Chemnitz; Humboldt University of Berlin	Conference proceedings	Yes	JZ
Burzio, G.; Guidotti, L.; Perboli, G.; Settanni, M.; Tadei, R.; Tesauri, F.	2010	Investigating the impact of a lane departure warning system in real driving conditions - A subjective field operational test	Italy	Centro Ricerche FIAT, Orbassano; Engineering Sciences and Methods Dept, Università di Modena e Reggio Emilia; Dept of Control and Computer Engineering, Politecnico Torino, Dept of Psychology, Università di Torino	Conference proceedings		JZ
Burzio, G.; Tadei, R.; Guidotti, L.	2010	A subjective field test on lane departure warning function - eurofot	Italy	Centro Ricerche FIAT, Orbassano; Engineering Sciences and Methods Dept, Università di Modena e Reggio Emilia; Dept of Control and Computer Engineering, Politecnico Torino	Conference proceedings		JZ
Chen, F.; Qvint, G.; Jarlengrip, J.	2007	Listen! There are other road users close to you–improve the traffic awareness of truck drivers	Sweden	Department of Computer Science and Engineering, Chalmers University of Technology, Gothenburg, Sweden Human System Integration, Volvo Technology Cooperation, Sweden	Conference proceedings	Yes	JZ
Cocron, P.; Bühler, F.; Franke, T.; Neumann, I.; Dielmann, B.; Krems, J. F.	2013	Energy recapture through decleration regenerative braking in electric vehicles from a user perspective	Germany	Dept. of Psychology, TU Chemnitz	Peer review journal	Yes	JZ, JW
Cocron, P.; Bühler, F.; Neumann, I.; Franke, T.; Krems, J. F.; Schwalm, M.; Keinath, A.	2011	Methods of evaluating electric vehicles from a user’s perspective – the MINI E field trial in Berlin	Germany	Dept. of Psychology, TU Chemnitz; BMW Group	Peer review journal	Yes	JZ, LP
Cocron, P.; Neumann, I.; Kreußlein, M.; Pereira, M.; Wanner, D.; Drugge, L.; Bierbach, M.; Augusto, B.	2014	Driver and vehicle behaviour to power train failures ion electric vehicles - experimental results of field and simulator studies	EU	ERA-Net Work programme: Electormobility +	Report		JZ
Comte, S. L.	1999	Speed management: targeting the road, vehicle or driver?	UK	Institute for Transport Studies, University of Leeds	Conference proceedings		JZ
Comte, S.L.	2000	New systems: new behaviour?	UK	Institute for Transport Studies, University of Leeds	Peer review journal	Yes	JZ, LP
Comte, S. L.	2001	Intellgent Speed Adaptation: Evaluating the possible effects of an innovative speed management system on driver behaviour and road safety	UK	Institute for Transport Studies, University of Leeds	Doctorate or graduate thesis		JZ
Comte, S.L.; Carsten, O.	1998	The effectiveness of ATT and non-ATT treatments for sharp curves on two-lane rural roads	UK	University of Leeds	Conference proceedings		JW, JZ
Comte, S.L.; Jamson, A.H.	1998	The effects of ATT and non-ATT systems and treatments on speed adaptation behaviour	UK	University of Leeds	Report		JZ
Comte, S.L.; Jamson, A.H.	2000	Traditional and innovative speed-reducing measures for curves: an investigation of driver behaviour using a driving simulator	UK	Institute for Transport Studies, University of Leeds	Peer review journal	Yes	JZ, LP
Comte, S.L.; Wardman, M.; Whelan, G.	2000	Drivers' acceptance of automatic speed limiters: implications for policy and implementation	UK	Institute for Transport Studies, University of Leeds	Peer review journal	Yes	JZ, LP
Cooke, T.; Horberry, T.	2011	Driver satisfaction with a modified proximity detection system in mine haul trucks following an accident investigation	Australia	Minerals Industry Safety and Health Centre, University of Queensland	Conference proceedings		JZ
Cottrell, N. D.; Barton, B. K.	2012	The impact of artificial vehicle sounds for pedestrians on driver stress	USA*	Dept. of Psychology and Communication Studies, University of Idaho	Peer review journal	Yes	JZ, LP
Creaser, J.; Manser, M.	2012	Connected Vehicles Program: Driver Performance and Distraction Evaluation for In-vehicle Signing	USA	Center for Transportation Studies University of Minnesota, HumanFIRST Program	Report		JW, JZ
Creaser, J.; Manser, M.	2013	Evaluation of Driver Performance and Distraction During Use of In-Vehicle Signing Information	USA	Center for Transportation Studies University of Minnesota, HumanFIRST Program	Peer review journal	Yes	JZ, LP
Creaser, J.; Rakauskas, M.; Ward, N.; Laberge, J.	2007	A simulator-based evaluation of smart infrastructure concepts for intersection decision support for rural thru-stop intersections	USA	Dept. of Mechanical Engineering, Intelligent Transportation Systems Institute, University of Minnesota	Report		JZ
Creaser, J. I.; Rakauskas, M. E.; Ward, N. J.; Laberge, J. C.; Donath, M.	2007	Concept evalutation of intersection decision support (IDS) system interfaces to support drivers' gap acceptance decisions at rural stop-controlled intersections	USA	Dept. of Mechanical Engineering, Intelligent Transportation Systems Institute, University of Minnesota	Peer review journal	Yes	JZ, LK
Davidse, R. J.; Hagenzieker, M. P.; van Wolffelaar, P. C.; Brouwer, W. H.	2009	Effects of In-Car Support on Mental Workload and Driving Performance of Older Drivers	Netherlands	SWOVA Institute for Road Safety Research, Leidschendam; Delft University of Technology; University of Groningen	Peer review journal	Yes	LK, JZ
De Boer, J.; Chaziris, A.; Vreeswijk, J; Bie, J.; van Arem, B	2010	The accuracy and timing of pedestrian warnings at intersections: The acceptance from drivers and their preferences	Netherlands	Department of Civil Engineering, University of Twente; Peek Traffic BV, Amersfoort; Centre for Transport Studies, Faculty of Engineering Technology, University of Twente; Department of Transport and Planning, Delft University of Technology	Conference proceedings	Yes	LK
de Waard, D.; Brookhuis, K.	1997	Behavioural adaptation of drivers to warning and tutoring messages: Results from an on-the-road and simulator test	Netherlands	Centre for Environmental and Traffic Psychology, University of Groningen	Peer review journal	Yes	JZ, LK
de Waard, D.; Brookhuis, K.; Fabriek, E.; Wolffelaar, P.C.	2004	Driving the Phileas, a new automated public transport vehicle	Netherlands	Dept of Psychology, University of Groningen	Conference proceedings	Yes	JZ
de Waard, D.; Brookhuis, K.; Noordmans, M.C.; Hogema, J.H.; Visscher, R.M.	2004	A "thinking road surface"	Netherlands	Dept of Psychology, University of Groningen; Verenigde VTN Bedrijven; TNO Human Factors; Ministry of Transport, Roads to the Future Project	Monograph, book, book chapter		JZ
de Waard, D.; Dijksterhuis, C.; Brookhuis, K. A.	2009	Merging into heavy motorway traffic by young and elderly drivers	Netherlands	Faculty of Behavioural and Social Sciences, University of Groningen; Faculty Technology, Policy and Management, Delft University of Technology	Peer review journal	Yes	JZ, LK
de Waard, D.; van der Hulst, M.; Brookhuis, K. A.	1999	Elderly and young drivers' reaction to an in-car enforcement and tutoring system	Netherlands	Centre for Environmental and Traffic Psychology, University of Groningen	Peer review journal	Yes	JZ, LK
de Waard, D.; van der Hulst, M.; Hoedemaeker, M.; Brookhuis, K. A.; Soeteman, H.	1997	Human Factors, an emergency situtation and the Automated Highway System	Netherlands	Centre for Environmental and Traffic Psychology, University of Groningen; Delft University of Technology; Transport Research Centre, Ministry of Transport & Public Works	Conference proceedings		JZ
de Waard, D.; van der Hulst, M.; Hoedemaeker, M.; Brookhuis, K. A.	1999	Driver behavior in an emergency situation in the Automated Highway System	Netherlands	Centre for Environmental and Traffic Psychology, University of Groningen; Delft University of Technology; Transport Research Centre, Ministry of Transport & Public Works	Peer review journal	Yes	JZ, JW
Dela, N.; Laine, L.; Bruzelius, F.; Sehammar, H.; Renner, L.; Markkula, G.; Karlsson, A.	2009	A pilot evaluation of using large movement driving simulator experiments to study driver behaviour influence on active safety systems for commercial heavy vehicles	Sweden	Volvo 3P, Chassis Strategies & Vehicle Analysts, Dept 26661; VTI Göteborg; Volvo Technology AB, Göteborg	Report		LP, JZ
Dijksterhuis, C.; Stuiver, A.; Mulder, B; Brookhuis, K. A.; de Waard, D.	2012	An Adaptive Driver Support System: User Experiences and Driving Performance in a Simulator	Netherlands	Department of Psychology, University of Groningen	Peer review journal	Yes	LK, JZ
Donmez, B.; Boyle, L.N.; Lee, J.D.	2007	Safety vehicles using adaptive interface technology. Final Report: Phase 2 Distraction Mitigation Evaluation	USA	University of Iowa	Report		LP, JZ
Donmez, B.; Boyle, L. N.; Lee, J. D.	2007	Safety implications of providing real-time feedback to distracted drivers	USA	Dept. of Mechanical and Industrial Engineering, University of Iowa	Peer review journal	Yes	JZ, LP
Donmez, B.; Boyle L.N.; Lee, J.D.	2008	Associations between trust and perceived usefulness as drivers adapt to safety systems	USA	Dept of Aeronautics and Astronautics, Massachusetts Institute of Technology; Mechanical and Industrial Engineering, University of Iowa	Conference proceedings		JZ, LK
Donmez, B.; Boyle, L. N.; Lee, J. D.	2008	Mitigating driver distraction with retrospective and concurrent feedback	USA	Dept. of Mechanical and Industrial Engineering, University of Iowa	Peer review journal	Yes	JZ, LK
Donmez, B.; Boyle,. L.N.; Lee, J.D.; McGehee, D.V.	2005	Driver Acceptance of Distraction Mitigation Strategies: Focus Group and Simulator Studies	USA	Dept of Mechanical and Industrial Engineering, University of Iowa; Human Factors and Vehicle Safety Research Program, Public Policy Center, University of Iowa	Conference proceedings		LP, JZ
Donmez, B.; Boyle, L. N.; Lee, J. D.; McGehee, D. V.	2006	Drivers' attitudes toward imperfect distraction mitigation strategies	USA	Dept. of Mechanical and Industrial Engineering, University of Iowa	Peer review journal	Yes	JZ, LP
Dotzauer, M.; de Waard, D.; Caljouw, S. R.; Brouwer, W. H.	2013	Longer-term exposure to an intersection assistant: effects of ADAS use on intersection performance of drivers diagnosed with Parkinson’s disease	Netherlands	Department of Neurology; Department of Clinical and Developmental Neuropsychology; Centre for Human Movement Sciences all Groningen	Peer review journal	Yes	JZ, JW
Dotzauer, M; Preuk, K.	2016	Forschungsprojekt UR:BAN - Mensch im Verkehr. Schlussbericht	Germany	DLR e.V. Institut für Verkehrssystemtechnik	Report		JZ
Drew, D.A.	2010	In-vehicle decision support systems for collision avoidance at rural thru-stop intersections	USA	University of Minnesota	Doctorate or graduate thesis		JZ
Drew, D. A.; Hayes, C. C.	2012	An Exploration of Decision Support for Drivers Inside and Outside the Vehicle	USA	University of Minnesota	Peer review journal	Yes	LP, JZ
Drucker, C. J.	2013	An epidemiological approach to emergency vehicle advanced warning system development: a two-phase study	USA	University of Minnesota	Doctorate or graduate thesis	Yes	JZ
Dubbeldam, R.; Baten, C.; Buurke, J.H.; Rietman, J.S.	2017	SOFIE, a bicycle that supports older cyclists?	Netherlands	Roessingh Research and Development; Dept. of Biomedical Signals and Systems, University of Twente; Dept. of Biomedical Engineering, University of Twente	Peer review journal	Yes	JZ, KW
Duffield, T.J.; Krupenia, S.	2015	Drivers' Interaction Preferences in Autonomous Vehicle Multimodal Interactive Systems	Sweden	Styling and Vehicle Ergonomics, Scania CV AB	Conference proceedings	Yes	JZ
Engelbrektsson, P.; Karlsson, M.	2012	User Uptake of Nomadic and After Market Devices. Experiences from the TeleFOT project	Sweden	Department of Product and Production Development, Chalmers University of Technology	Conference proceedings	Yes	LP, JZ
Eriksson, A.; Banks, V.A.; Stanton, N.A.	2017	Transition to manual: Comparing simulator with on-road control transitions	UK	Faculty of Engineering and the Environment, University of Southhampton; Human Factors Research Group, University of Nottingham	Peer review journal	Yes	JZ, JW
Eriksson, A.; Petermeijer, S.M.; de Winter, J.C.F.; Bengler, K.J., Stanton, N.A.	2017	Rolling out the red (and green) carpet: supporting driver decision making in automation-to-manual transitions	UK	Faculty of Enigneering and the Environment, University of Southampton; VTI Swedish National Road and Transport Research Institute; Dept for Ergonomics, Faculty of Mechanical Engineering, TU Munich; Dept of Biomechnical Engineering, Faculty of Mechanical Engineering, Delft University of Technology	Peer review journal	Yes	JZ, LK
Eriksson, L.; Bolling, A.; Alm, T.; Andersson, A.; Ahlström, C.; Blissing, B.; Nilsson, G.	2013	LDW or Rumble Strips in Unintentional Lane Departures: Driver Acceptance and Performance	Sweden	VTI, Swedish National Road and Transport Research Institute; HiQ; Swedish Road Marking Association	Monograph, book, book chapter		JZ
Eriksson, L.; Bolling, A.; Alm, T.; Andersson, A.; Ahlström, C.; Blissing, B.; Nilsson, G.	2013	Driver acceptance and performance with LDW and rumble strips assistance in unintentional lane departures	Sweden	Volvo Cars; Swedish Transport Administration; Swedish Road Marking Association (SVMF); HiQ; the Swedish National Road and Transport Research Institute (VTI)	Report		JZ
Evans, G.; Blythe, P.; Panou, M.	2014	Evaluating Transport Technologies for Mitigating the Impact of Emergency Events: Findings from the SAVE ME Project	UK; Greece	School of Civil Engineering and Geosciences, Newcastle University; Hellenic Institute of Transport, Centre for Research and Technology Hellas	Conference proceedings		JZ
Fagerlönn, J.; Hammarberg, K.; Lindberg, S.; Sirkka, A.; Larsson, S.	2017	Designing a Multimodal Warning Display for an Industrial Control Room	Sweden	RISE Interactive, Pitea	Conference proceedings	Yes	JZ
Feenstra, P.; Pauwelussen, J.; Wilschut, E.; Koenders, E.; van Leijsen, A.; Vreeswijk, E.	2009	HMI considerations for the dutch CVIS-Safespot test site	Netherlands	TNO BU Human Factors, Soesterberg; Peek Traffic by; TNO BU Automotive	Conference proceedings		JZ
Feenstra, P.; van der Horst, R.	2006	Driver behaviour in motorway car-following transitions and driver support systems	Netherlands	TNO Defence, Security and Safety, BU Human Factors	Conference proceedings		JZ
Fischer, N.M.; Brauer, R.R.; Grande, G.; Unger, M.; Wilke, S.	2014	Kontextspezifität der Akzeptanz von Assistenzsystemen am Beispiel einer Datenbrille	Germany	Hochschule für Technik, Wirtschaft und Kultur, Fakultät Architektur und Sozialwissenschaften, Leipzig; Hochschule für Technik Wirtschaft und Kultur, Fakultät Elektrotechnik und Informationstechnik, Leipzig; Tu Dresden, Fakultät Mathematik und Naturwissenschaften, Institut für Arbeits-, Organisations- und Sozialpsychologie	Conference proceedings	Yes	JZ
Franke, T.; Günther, M.; Trantow, M.; Krems, J. F.	2017	Does this range suit me? Range satisfacion of battery electric vehicle users	Germany	Institute for Multimedia and Interactive Systems, Engineering Psychology and Cogniticve Ergonomics, University of Lübeck; Dept. of Psychology, Cognitice and Engineering Psychology, TU Chemnitz	Peer review journal	Yes	JZ
Franke, T.; Günther, M.; Trantow, M.; Krems, J. F.; Vilimek, R.; Keinath, A.	2014	Examining user-range interaction in battery electric vehicles–a field study approach	Germany	Department of Psychology, Technische Universität Chemnitz, Germany Concept Quality and Usability, BMW Group, Munich	Conference proceedings		JZ
Franke, T.; Rauh, N.; Günther, M.; Trantow, M.; Krems, J. F.	2016	Which Factors Can Protect Against Range Stress in Everday Usage of Battery Electric Vehicles? Toward Enhancing Sustainability of Electric Mobility Systems	Germany	Dept. Of Psychology , Cognitive and Engineering Psychology, TU Chemnitz	Peer review journal	Yes	JZ, LK
Ganzhorn, M.; Diederichs, J. P. F.; Widlroither, H.	2011	Enhancing the reproduction of road signs in automotive HMIs to protect children	Germany	University Stuttgart IAT, Stuttgart, Germany	Conference proceedings		JZ
Garrison, T.M.; Jensen, L.T.; Cagle, L.; McGinley, J.A.; Carruth, D.W.; Bethel, C.L.; Goodin, C.T.; Durst, P.J.	2017	Conducting a Prostpective Review for Enhanced Interface Features for Unmanned Ground Vehicle Operation	USA	Center for Advanced Vehicular Systems, Mississippi State University; U.S. Army Engineer Research and Development Center, Vicksburg	Monograph, book, book chapter		JZ
Gauerhof, L.; Kürzl, A.; Lienkamp, M.	2015	ADAS for the Communication between Automated and Manually Driven Cars	Germany	Institute of Automotive Technology, TU München	Conference proceedings	Yes	LP, JZ
Giang, W.C.W.; Hoekstra-Atwood, L.; Donmez, B.	2014	Driver Engagement in Notifications: A Comparison of Visual-Manual Interaction between Smartwatches and Smartphones	Canada	Dept of Mechanical and Industrial Engineering, University of Toronto	Conference proceedings	Yes	LP, JZ
Günther, M.; Müller-Blumhagen, S.; Krems, J.F.	2016	The importance of acceptance for the usage of multimodal sharing systems in corporate transportation	Germany	TU Chemnitz	Conference proceedings	Yes	LP, JZ
Günther, M.; Rauh, N.; Krems, J.F.	2017	Conducting a study to investigate eco-driving strategies with battery electric vehicles - a multiple method approach	Germany	Cognitive and Engineering Psychology, TU Chemnitz	Conference proceedings		LP, JZ
Hagemann, A.; Björk, H.	2005	A system for driver identity verification	Sweden	Dept of Electrical Engineering, Linköping Institute of Technology	Doctorate or graduate thesis		JZ
Hajek, W.	2014	Workload-Adaptive Cruise Control	Germany	TU Chemnitz	Doctorate or graduate thesis	Yes	JZ
Hartwich, F.	2017	Supporting older drivers through emerging in-vehicle technologies: performance-related aspects and user acceptance - study 1 (ARD)	Germany	Human- und Sozialwissenschaftliche Fakultät TU Chemnitz	Doctorate or graduate thesis		JZ
Hartwich, F.; Beggiato, M; Krems, J	2018	Driving comfort, enjoyment and acceptance of automated driving – effects of drivers’ age and driving style familiarity (Part of doctorate thesis Hartwich (2018) under the name Supporting older drivers through emerging in-vehicle technologies: performance-related aspects and user acceptance	Germany	Human- und Sozialwissenschaftliche Fakultät TU Chemnitz	Peer review journal	Yes	JZ, LK
Hegeman, G.; van der Horst, R.; Brookhuis, K.A.; Hoogendoorn, S.P.	2007	Functioning and Acceptance of Overtaking Assistant Design Tested in Driving Simulator Experiment	Netherlands	Civil Engineering and Geosciences, Transport and Planning, Delft University of Technology; TNO Defence, Security and Safety, BU Human Factors; Technology, Policy and managemet; Delft University of Technology	Peer review journal	Yes	JZ
Heinig, K.	2009	Zu Wirkung ausgewählter Fahrerinformationssysteme auf die Verkehrssicherheit	Germany	Fakultät Architektur, Bauingineurwesen und Umweltwissenschaften der Technischen Universität Carolo-Wilhelmina zu Braunschweig	Doctorate or graduate thesis	Yes	JZ
Henzler, M.; Boller, A.; Buchholz, M.; Dietmeyer, K.	2015	Are Truck Drivers Ready to Save Fuel? The Objective and Subjective Effectiveness of an Ecological Driver Assistance System	Germany	Department of Truck Product Engineering, Daimler AG, Stuttgart, Germany Institute of Measurement, Control, and Microtechnology, University of Ulm, Germany	Conference proceedings	Yes	JZ
Heyes, D.; Daun, T. D.; Lienkamp, M.	2014	Verbundprojekt: ViFa–Virtueller Fahrtrainer–Entwicklung eines virtuellen Fahrtrainers zur Unterstützung einer verbrauchs-und verschleißoptimierten Fahrweise. Schlussbericht	Germany	MAN Truck & Bus AG; Institute of Automotive Technology, Technische Universität München	Report		JZ
Heyes, D.; Daun, T. D.; Zimmermann, A.; Lienkamp, M.	2015	The Virtual Driving Coach - design and preliminary testing of a predictive eco-driving assistance system for heavy-duty vehicles	Germany	MAN Truck & Bus AG; Institute of Automotive Technology, Technische Universität München	Peer review journal	Yes	JZ
Hibberd, D.L.; Jamson, A.H.; Jamson, S.L.	2015	The Effects of an Eco-Driving Interface on Driver Safety and Fuel Efficiency	UK	University of Leeds	Conference proceedings		JZ
Hibberd, D.L.; Jamson, A.H.; Jamson, S.L.	2015	The design of an in-vehicle assistance system to support eco-driving	UK	Institute for Transport Studies, University of Leeds	Peer review journal	Yes	JZ
Hjälmdahl, M.; Krupenia, S.; Thorslund, B.	2017	Driver behaviour and driver experience of partial and fully automated truck platooning - a simulator study	Sweden	Swedish Road and Transport Research Institute (VTI)	Peer review journal	Yes	JZ, LK
Hock, P.; Kraus, J.; Walch, M.; Lang, N.; Baumann, M.	2016	Elaborating Feedback Strategies for Maintaining Automation i Highly Automated Driving	Germany	Institute of Media Informatics, Ulm University; Institute of Psychology and Education, Dept. Human Factors, Ulm University	Conference proceedings	Yes	JZ
Hoedemaeker, M.; Brookhuis, K.	1998	Behavioural adaptation to driving with an adaptive cruise control (ACC)	Netherlands	Faculty of Technology, Policy and Management, Delft University of Technology; Centre for Environmental and Traffic Psychology, University of Groningen	Peer review journal	Yes	JW, JZ
Hoogendoorn, R. G.; Breukink, H. J.; van Arem, B.	2012	A context aware intelligent speed adaptation system: a field operational test	Netherlands	Transport and Planning department, Faculty of Civil Engineering and Geosciences, Delft University of Technology	Conference proceedings		JZ
Horberry, T.; Cooke, T.	2014	Operator Acceptance of New Technology for Industrial Mobile Equipment	UK, Australia	Minerals Industry Safety and Health Centre, University of Queensland; Engineering Design Centre, University of Cambridge	Monograph, book, book chapter		JZ
Houtenbos, M.	2009	Interacting drivers at intersections: what can make them more safe and more efficient?	Netherlands	SWOV Institute for Road Safety Research	Conference proceedings		JZ
Houtenbos, M.; de Winter, J.C.F.; Hale, A.R.; Wieringa, P.A.; Hagenzieker, M. P.	2017	Concurrent audio-visual feedback for supporting drivers at intersections: A study using two linked driving simulators	Netherlands	SWOV Institute for Road Safety Research; Dept. Of Biomechanical Engineering, Delft University of Technology; Safety Science Group, Delft University of Technology; Dept. Of Transport & Planning, Delft University of Technology	Peer review journal	Yes	JZ, LK
Huebner, J.; Woerndl, W.	2011	Proactivity in a Mobile, Context-Aware Recommender System	Germany	Institut für Informatik, TU München	Monograph, book, book chapter		JZ
Jagiellowicz-Kaufmann, M.S.	2016	Akzeptable und effektive Pedal- und Motorkennlinien zur Unterstützung von Eco-Driving im Elektrofahrzeug	Germany	Fakultät für Humanwissenschaften, Julius-Maximilians-Universität Würzburg	Doctorate or graduate thesis	Yes	JZ
Jamson, A.H.; Lai, F.C.H.; Carsten, O.	2008	Potential benefits of an adaptive forward collision warning system	UK	Institute for Transport Studies, University of Leeds	Peer review journal	Yes	JZ, LK
Jamson, S.	2006	Would those who need ISA, use it? Investigating the relationship between driver's speed choice and their use of a coluntary ISA system	UK	Institute for Transport Studies, University of Leeds	Peer review journal	Yes	JZ, JW
Jamson, S.; Chorlton, K.; Carsten, O.	2012	Could Intelligent Speed Adaptation make overtaking unsafe?	UK	Institute for Transport Studies, University of Leeds	Peer review journal	Yes	JZ
Jamson, S.L.; Kappe, B.; Louw, T.	2013	Performance Indicators and acceptance analysis plan	UK	Univeristy of Leeds	Report		JZ
Jiménez, F.; Naranjo, J. E.; Serradilla, F.; Pérez, E.; Hernández, M. J.; Ruis, T.; Anaya, J.J.; Díaz, A.	2016	Intravehicular, Short- and Long-Range Communication Information Fusion for Providing Safe Speed Warnings	Spain	University Institute for Automoile Research, Valencia; Psychology Faculty, Universidad Complutense de Madrid	Peer review journal	Yes	JZ
Jizba, T.	2017	Influence of HMI ergonomy on drivers in cooperative systems area	Czech Republic	Czech Technical University in Prague, Faculty of Transportation Sciences	Conference proceedings	Yes	JZ
Källhammer, J.-E.; Smith, K.	2010	Bridging Laboratory and Field Studies	USA; Sweden	Autoliv Development AB, Vargarda, Sweden; Cognitive Engineering and Decision Making Inc., Des Moines, Washington	Conference proceedings		JZ
Karlsson, M.; Alonso, M.; Engelbrektsson, P.; Hakonen, M.; Innamaa, S.; May, A.; Ross, T.; Vega, M.H.	2011	Implications of take-up	EU	TeleFOT, Field Operational Tests of Aftermarket and Nomadic Devices in Vehicles	Report		JZ
Kettwich, C.; Haus, R.; Temme, G.; Schieben, A.	2016	Validation of a HMI Concept Indicating the Status of the Traffic Light Signal in the Context of Automated Driving in Urban Environment	Germany	German Aerospace Center, Braunschweig	Conference proceedings		JZ
Keuntje, P.; Poormohammadroohafza, F.	2014	Car Infotainment: An early analysis of driver perceptions towards apps in the car	Sweden	School of Economicy and Management, Department of Informatics, Lund University	Doctorate or graduate thesis		JZ
Kidd, D.G.	2012	Response of part-time belt users to enhanced seat belt reminder systems of different duty cycles and duration	USA	Insurance Institute for Highway Safety, Arlington, VA	Peer review journal	Yes	JZ
Köhler, L.; Bengler, K.; Mergl, C.; Maier, K.; Wimmer, M.	2014	Validation of a Telephone Manager for stressful driving situations	Germany	AUDI AG Ingolstadt; Institute of Ergonomics, TU München; Brose Fahrzeugteiler GmbH; Institute of General Psychology, Katholische Universität Eichstätt-Ingolstadt	Conference proceedings	Yes	JZ
Körber, M.; Prasch, L.; Bengler, K.	2018	Why Do I Have to Drive Now? Post Hoc Explanations of Takeover Requests	Germany	TU München	Peer review journal	Yes	JZ
Kotte, J.; Josten, J.; Zlocki, A.; Eckstein, L.	2016	Impact of a visual and haptic driver advide and preview system on a range optimized way of driving in electric vehicles	Germany	Forschungsgesellschaft Kraftfahrwesen Aachen; Institut für Kraftfahrzeuge, RWTH Aachen University	Conference proceedings		JZ
Koustanai, A.; Cavallo, V.; Delhomme, P.	2012	Simulator Training With a Forward Collision Warning System: Effects on Driver-System Interactions and Driver Trust	France	French Institute of Science and Technology for Transportation	Peer review journal	Yes	JZ
Krahnstöver, A.Z.	2017	Licht führt!? Konzeption und Evaluation van Fahrmanöverunterstützung durch lichtbasierte Fahrassistenzsysteme	Germany	Volkswagen AutoUni; TU Braunschweig, Fakultät für Lebenswissenschaften	Doctorate or graduate thesis	Yes	JZ
Krems, J.F., Bartholdt, L.; Cocron, P.; Dielmann, B.; Franke, T.M; Henning, M.;M Ischebeck, M.; Schleinitz, K.; Zilyte-Lennertz, M.	2011	Schlussbericht zum Forschungsvorhaben. Verbundprojekt: MINI E powered by Vattenfall V2.0	Germany	TU Chemnitz; Vattenfall	Report		JZ
Lai, F.; Jamson, S.; Carsten, O.	2012	Final Report: The effect of Advisory ISA on drivers' choice of speed and attitudes to speeding	UK	Institute for Transport Studies, University of Leeds	Report		JZ
Langer, D.; Dettman, A.; Leonhardt, V.; Pech, T.; Bullinger, A.C.; Wanielik, G.	2016	Predicting driver intentions: A study on users' intention to use	Germany	TU Chemnitz	Conference proceedings	Yes	LK, JZ
Lapoehn, S.; Dziennus, M.; Utesch, F.; Kelsch, J.; Schieben, A.; Dotzauer, M.; Hesse, T.; Köster, F.	2016	Interaction design for nomadic devices in highly automated vehicles	Germany	Institute of Transportation Systems, German Aerospace Center	Monograph, book, book chapter		JZ
LeBlanc, D.; Buonarosa, M.L.; Blankespoor, A.; Sayer, J.	2009	Integrated Vehicle-Based Safety System Light Vehicle Extended Pilot Test Summary Report	USA	U.S. Department of Transportation, National Highwa Traffic Safety Administration, office of Vehicle Safety Research; University of Michigan, Transportation Research Institute	Report		JZ
LeBlanc, D; Sayer, J. R.; Bao, S.; Bogard, S.; Buonarosa, M. L.; Blankespoor, A.; Funkhouser, D.	2011	Driver Acceptance and behavioral changes with an Integrated warning system: Key findings from the IVBSS FOT	USA	University of Michigan Transportation Research Institute	Conference proceedings		JZ
Liao, C.-F.	2013	Using a Smartphone Application to Support Visually Impaired Pedestrians at Signalized Intersection Crossings	USA	Minnesota Traffic Observatory, Dept. Of Civil Engineering, University of Minnesota	Peer review journal	Yes	JZ, JW
Lorenz, L.M.	2013	Enticklung und Bewertug aufmerksamkeitslenkender Warn- und Informationskonzepte für Fahrerassistenzsysteme	Germany	Fakultät für Maschinenwesen, TU München	Doctorate or graduate thesis		JZ
Ma, J.; Zhou, F.	2016	Virtual dynamic message signs: a future mode for basic public traveller information	USA	Transportation Solutions and Technology Applications Division, Leidos, Inc., VA, USA	Peer review journal	Yes	JZ, JW
Madigan, R.; Louw, T.; Merat, N.	2018	The effect of varying levels of vehicle automation on driver's lane changing behaviour	UK	Institute for Transport Studies, University of Leeds	Peer review journal	Yes	JZ
Martin, B.B.	2010	Evaluating the impacts of advanced driver assistance systems using a driving simulator - an exploratory study	USA	University of Florida	Doctorate or graduate thesis		JZ
McElheny, M. J.	2005	Multidimensional Warnings: Evaluating Curve Warning Stimuli in an On-Road Environment	USA	Virginia Polytechnic Institute and State University	Doctorate or graduate thesis		JZ
McIlroy, R.C.; Stanton, N.	2015	Encouraging eco-driving with multi-sensory information	UK	Faculty of Engineering and Environment, The University of Southampton	Conference proceedings		JZ
McIlroy, R.C.; Stanton, N.; Godwin, L.	2017	Good vibrations: Using a haptic accelerator pedal to encourage eco-driving	UK	Faculty of Engineering and Environment, The University of Southampton	Peer review journal	Yes	JZ
McIlroy, R.C.; Stanton, N.; Godwin, L.; Wood, A.P.	2017	Encouraging Eco-Driving with visual, auditory, and virbotactile stimuli	UK	Faculty of Engineering and Environment, The University of Southampton	Peer review journal	Yes	JZ
McIlroy, R.C.; Stanton, N.	2017	Eco-driving: From Strategies to Interfaces; Two studies presented as two book chapters	UK	Faculty of Engineering and Environment, The University of Southampton	Monograph, book, book chapter		JZ
Meijer, S. T.	2012	Mental workload and acceptance in relation to physical speed reducing measures	Netherlands	Not directly reported; presumably Institute for Road Safety Research, The Hague and University of Amsterdam	Doctorate or graduate thesis		JZ
Meijering, V.C.S.	2014	Can facial similarity enhance trust in autonomous driving?	Netherlands	Eindhoven University of Technology	Doctorate or graduate thesis		JZ
Melman, T.; de Winter, J.C.F., Abbink, D.A.	2017	Does haptic steering guidance instigate speeding? A driving simulator study into causes and remedies	Netherlands	Department of BioMechanical Engineering, Delft University of Technology	Peer review journal	Yes	JZ
Merrikhpour, M.	2017	Utilizing the Social Norms Theory for Mitigating Teen Driver Distraction	Canada	Dept of Mechanical and Industrial Engineering, University of Toronto	Doctorate or graduate thesis	Yes	JZ
Müllhäuser, M.	2017	Tactile cueing with active cycling stick for helicopter obstacle avoidance: development and pilot acceptance	Germany	Deutsches Zentrum für Luft- und Raumfahrt e.V., Institut für Flugsystemtechnik	Peer review journal	Yes	JZ
Neumann, I.	2015	Energy Efficiency in Battery Electric Vehicle Use – Implications for the Driver Interface, the Driving Task, and Motivational Aspects. (Includes Neumann, I.; Cocron, P.; Kreußlein, M.; Wanner, D.; Bierbach, M.; Krems, JF; BEV, E., 2015)	Germany	Fakultät für Human- und Sozialwissenschaften, TU Chemnitz	Doctorate or graduate thesis		JZ
Neumann, I.; Cocron, P.; Franke, T.; Krems, J.F.	2010	Electric vehicles as a solution for green driving in the future? A field study examining the user acceptance of electric vehicles	Germany	Dept of Psychology - Cognitive and Engineering Psychology, TU Chemnitz	Conference proceedings		LP, JZ
Neumann, I.; Cocron, P.; Kreußlein, M.; Wanner, D.; Bierbach, M.; Krems, JF; BEV, E.	2015	Eco-Driving–Competence, Motivational Aspects, and the Effectiveness of Eco-Instructions; CAVE: included in Neumann, I. (2015) dissertation	Germany	Fakultät für Human- und Sozialwissenschaften, TU Chemnitz	Conference proceedings		JZ
Neumann, I.; Kreußlein, M.; Cocron, P.; Weichold, S.; Krems, J.F.	2015	Eco-Pedaling - Examining a highly automated eco-assistance system for pedelecs from a user perspective	Germany	TU Chemnitz	Monograph, book, book chapter		JZ
Neurauter, M. L.	2001	Multidimensional Warnings: Determining an Appropriate Stimulus for a Curve-Warning Device	USA	Virginia Polytechnic Institute and State University	Doctorate or graduate thesis		JZ
Nixon, G.	2015	Effective Human-Machine Interfaces for Aerial Telemanipulation	Netherlands	Delft University of Technology	Doctorate or graduate thesis		JZ
Nordhoff, S.; de Winter, J.; Madigan, R.; Merat, N.; van Arem, B.; Happee, R.	2018	User acceptance of automated shuttles in Berlin-Schöneberg: A questionnaire study	Germany	Dept of Transport and Planning, Delft University of Technology; Innovation Centre for Mobility and Societal Change; Wissenschaftszentrum Berlin; Department BioMechanical Engineering, Delft University of Technology; Institute for Transport Studies, University of Leeds; Dept Cognitive Robotics, Delft University of Technology	Peer review journal	Yes	JZ
Öhrling, T.; Grane, C.; Normark, C.J:	2017	Visual communication for improved safety learning and safety culture in mining industry	Sweden	Lulea University of Technology	Conference proceedings		JZ
Opperud, A.; Karlsson, A.-S.; Piamonte, P.	2006	A user-centred approach in developing preventive safety systems	Sweden	Volvo Technology Corporation, Gothenburg, Sweden	Monograph, book, book chapter		JZ
Othersen, I.	2016	Vom Fahrer zum Denker und Teilzeitlenker: Einflussfaktoren und Gestaltungsmerkmale nutzerorientierter Interaktionskonzepte für die Überwachungsaufgabe des Fahrers im teilautomatisierten Modus	Germany	Technischen Universität Braunschweig, Fakultät für Lebenswissenschaften	Doctorate or graduate thesis	Yes	JZ
Panou, M.; Touliou, K.; Mixco, V.J.; Cabrera, M.F.	2013	An innovative system for guiding travellers through mobile phone in transportation hubs under emergencies	Greece; Spain	Hellenic Institute of Transport; Life-Supporting Technologies-UPM, ETSI- Telecomunicacion	Conference proceedings		JZ
Perelló, J. R.; García, A.	2017	A Case Study of Cooperative Design on Integrated Smart-Car Systems: Assessing Drivers’ Experience	Spain	University of the Balearic Islands, Automotive Technology Centre of Galicia	Conference proceedings		JZ
Perelló, J.R.; Gomila, A.; García-Quinteiro, E.M.; Miranda, M.	2016	Testing New Solutions for Eco-Driving: Haptic Gas Pedals in Electric Vehicles	Spain	University of the Balearic Islands, Automotive Technology Centre of Galicia	Peer review journal	Yes	JZ
Petermeijer, S.; Abbink, D.A.; de Winter, J.	2015	Should Drivers Be Operating Within an Automation Free Bandwidth? Evaluating Haptic Steering Support Systems With Different Levels of Authority	Netherlands	TU München, Delft University of Technology	Peer review journal	Yes	JZ
Petermeijer, S.; Bazilinskyy, P.; de Winter, J.	2017	Take-over again: Investigating multimodal and directional TORs to get the driver back into the loop	Germany	Dept. For Ergonomics, Faculty of Mechanical Engineering, TU München; Dept. Of Biomechanical Engineering, Faculty of Mechanical, Maritime and Materials Engineering, Delft	Peer review journal	Yes	JZ
Petermeijer, S.; Cieler, S.; de Winter, J.	2017	Comparing spatially static and dynamic vibrotactile take-over requests in the driver seat	Germany	Dept. For Ergonomics, Faculty of Mechanical Engineering, TU München; Dept. Of Biomechanical Engineering, Faculty of Mechanical, Maritime and Materials Engineering, Delft; Division Interior, Interior Electronics Solutions, Continental Automotive, Babenhausen, Germany	Peer review journal	Yes	JZ
Petermeijer, S.; Doubek, F.; de Winter, J.	2017	Driver response times to auditory, visual, and tactile take-over requests: A simulator study with 101 participants	Germany; Netherlands	Institute of Ergonomics, TU München; Dept. Of BioMechanical Engineering, Delft University of Technology	Conference proceedings	Yes	JZ
Petermeijer, S.M.; Hornberger, P.; Ganotis, I.; de Winter, J.C.F.; Bengler, K.J.	2017	The Design of a Vibrotactile Seat for Conveying Take-Over Requests in Automated Driving	Germany; Netherlands	Lehrstuhl für Ergonomie, TU München; Dept of Biomechanical Engineering, Delft University of Technology	Conference proceedings		JZ
Pinotti, D.; Piccinini, G.F.B.; Tango, F.	2014	Adaptive human machine interface based on the detection of drivers cognitive state using machine learning approach	Italy*	RE:Lab s.r.l., Reggio Emilia; Applied Mechanics, Chalmers University of Technology; ICOOR, Reggio Emilia; E/E Systems, Centro Ricerche Fiat	Peer review journal	Yes	JZ
Politis, I.; Langdon, P.; Adebayo, D.; Bradley, M.; Clarkson, P.J.; Skrypchuk, L.; Mouzakitis, A.; Eriksson, A.; Brown, J.W.H.; Revell, K.; Stanton, N.	2018	An Evaluation of Inclusive Dialogue-Based Interfaces for the Takeover of Control in Autonomous Cars	UK; Sweden	Engineering Design Centre, University of Cambridge; Research & Technology Coventry; Swedish National Road and Transport Research Institute; Transportation Research Group University of Southampton	Conference proceedings	Yes	JZ
Portouli, E.; Papakostopoulos, V.; Lai, F.; Chorlton, K.; Hjälmdahl, M.; Wiklund, M.; Chin, E.; de Goede, R.; Hoedemaeker, D.M.; Brouwer, R.F.T.; Lheureux, F.; Saad, F.; Pianelli, C.; Abric, J-C.; Roland, J.	2006	Long-term phase test and results - Behavioural Effects and Driver-Vehicle-Environment Modelling	Greece; UK; Netherlands; France	CERTH/HIT; IST Leeds; VTI; PSA; TNO; LPS-University of Provence; INRETS; RENAULT	Report		JZ
Portouli, E.; Papakostopoulos, V.; Marmaras, N.	2011	On-road pilot study on the need for integrated interfaces of in-vehicle driver support systems	Greece	National Technical University of Athens, School of Mechanical Engineering University of the Aegean, Department of Product and Systems Design Engineering	Monograph, book, book chapter		JZ
Prasch, L.; Tretter, S.	2016	Ich bin dann mal raus. Erklärbares Automationsverhalten und Vertrauen	Germany	Lehrstuhl für Ergonomie, TU München; Dept Psychologie, Ludwig-Maximilians-Universität München	Conference proceedings	Yes	JZ
Rahman, M. M.; Lesch, M.F.; Horrey, W.J.; Strawderman, L.	2017	Assessing the utility of TAM, TBT, and UTAUT for advanced driver assistance systems	USA	Dept of Industrial and Systems Engineering, Mississippi State University; Liberty Mutual Research Institute for Safety, Hopkinton	Peer review journal	Yes	JZ
Rakauskas, M.; Ward, N.; Shankwitz, C.; Gorjestani, A.; Donath, M.	2003	System Performance and Human Factors Evaluation of the Driver Assistive System (DAS): Supplemental Track Test Evaluation	USA	HumanFIRST Program 1100 Mechanical Engineering, Minneapolis; Minnesota Department of Transportation	Report		JZ
Rakauskas, M.E.; Graving, J.S.; Manser, M.P.; Jennes, J.W.	2010	Determining the Accuracy and Acceptance of Using Driver Interface Display Components and Fuel Economy Information Types	USA	HumanFIRST Program, University of Minnesota; Westat, Rockville	Conference proceedings	Yes	JZ
Rakauskas, M.; Ward, N.; Gorjestani, A.; Shankwitz, C.; Donath, M.	2005	Evaluation of a DGPS Driver Assistive System for Snowplows and Emergency Vehicles	USA	HumanFIRST Program, University of Minnesota; Westat, Rockville Intelligent Vehicle Laboratory, University of Minnesota Intelligent Transportation Systems Institute, University of Minnesota	Conference proceedings	Yes	JZ
Raudszus, D.; Ranovona, M.; Geronimi, S.; Kunert, M.; Schubert, E.; Schaller, T.	2013	AsPeCSS. Assessment methodologies for forward looking Integrated Pedestrian and further extension to Cyclist Safety	EU	IKA, TOYOTA, PSA, BOSCH, BMW	Report		JZ
Risto, M.	2014	Cooperative In-Vehicle Advice: A study into drivers' ability and willingness to follow tactical driver advice	Netherlands	Universiteit Twente	Doctorate or graduate thesis	Yes	JZ
Roesener, C.; Sauerbier, J.; Zlocki, A.; Fahrenkrog, F.; Wang, L.; Várhelyi, A.; de Gelder, E.; Dufils, J.; Breunig, S.; Mejuto, P.; Tango, F.; Lanati, J.	2017	A Comprehensive Evaluation Approach for Highly Automated Driving	Germany; Sweden; Spain; Italy; Netherlands	Institut für Kraftfahrzeuge, RWTH Aachen; Forschungsgesellschaft Kraftfahrwesen mbH, Aachen; BMW Group; Lund University; TNO; German Federal Highway Research Institute - BASt; C.T.A.G. - Galician Automotive Technologic Centre; Centro Ricerche Fiat	Conference proceedings		JZ
Rook, A.M.; Hogema, J.H.	2005	Effects of Human-Machine Interface Design for Intelligent Speed Adaptation on Driving Behavior and Acceptance	Netherlands	TNO Human Factory, Soesterberg	Peer review journal	Yes	LP, JZ
Rook, A.M.; Hogema, J.H.; van der Horst, A.R.A.	2005	Intelligent Speed Adaptation: Acceptance and driving behaviour on rural roads	Netherlands	TNO Human Factors, Soesterberg	Conference proceedings		JZ
Saito, Y.; Mitsumoto, T.; Raksincharoensak, P.	2016	Effectiveness of a Risk Predictive Shared Steering Control Based on Potential Prediction of Collision with Vulnerable Road Users	Japan	Tokyo University of Agriculture and Technology	Conference proceedings	Yes	JZ
Sasangohar, F.; Donmez, B.; Easty, A.C.; Trbovich, P.L.	2015	Mitigating nonurgent interruptions during high-severity intensive care unit tasks using a task-severity awareness tool: A quasi-controlled observational study	Canada	Dept of Mechanical and Industrial Engineering, University of Toronto; HumanEra, Techna, University Health Network, Toronto; Insitute of Biomedical Engineering, University of Toronta	Peer review journal	Yes	JZ
Sayer, J.R.; Bogard, S.E.; Buonarose, M.L.; LeBlanc, D.J.; Funkhouser, D.S.; Bao, S.; Blankespoor, A.D.; Winkler, C.B.	2011	Integrated Vehicle-Based Safety System Light-Vehicle Field Operational Test Key Findings Report	USA	Transportation Research Institute, University of Michigan; U.S. Department of Transportation, Research and Innovative Technology Administration	Report		JZ
Sayer, J.R.; LeBlanc, D.; Mefford, M.L.; Devonshire, J.	2007	Field Test Results of a Road Departure Crash Warning System: Driver Acceptance, Perceived Utility and Willingness to Purchase	USA	University of Michigan	Conference proceedings	Yes	JZ
Schieben, A.; Griesche, S.; Hesse, T.; Fricke, N.; Baumann, M.	2014	Evaluation of three different interaction designs for an automatic steering intervention	Germany	Institute of Transportation Systems, German Aerospace Center (DLR), Braunschweig	Peer review journal	Yes	JZ
Schlicht, E.J.; Morris, N.L.	2016	Risk Evaluation for In-vehicle Sign Information	USA	Dept of Mechanical Engineering, HumanFIRST Program, University of Minnesota; Minnesota Department of Transportation; Office of Transportation System Management; Local Road Research Board	Report		JZ
Schmalfuß, F.; Mühl, K.; Krems, J.F.	2017	Dircet experience with battery electric vehicles (BEVs) matters when evaluating vehicle attributes, attitude and purchse intention	Germany	TU Chemnitz; Ulm University	Peer review journal	Yes	JZ
Shahab, Q.	2014	Cooperative speed assistance: Interaction and persuasion design	Netherlands	Eindhoven University of Technology	Doctorate or graduate thesis	Yes	JZ
Shahab, Q.; Terken, J.	2012	Speed vs. Acceleration Advise for Advisory Cooperative Driving	Netherlands	Eindhoven University of Technology	Monograph, book, book chapter		JZ
Shen, S.	2016	Quantifying drivers' responses to failures of semi-autonomous vehicle systems	USA	Dept of Industrial Engineering, Clemson University	Doctorate or graduate thesis		JZ
Shen, S.; Neyens, D.M.	2014	Assessing drivers' performance when automated driver support systems fail with different levels ot automation	USA	Dept of Industrial Engineering, Clemson University	Conference proceedings		JZ
Shen, S.; Neyens, D.M.	2017	Assessing drivers' response during automated support system failures with non-driving tasks	USA	Dept of Industrial Engineering, Clemson University	Peer review journal	Yes	JZ
Shyrokau, B.; de Winter, J.; Stroosma, O.; Dijksterhuis, C.; Loof, J.; van Paassen, R.; Happee, R.	2018	The effect of steering-system linearity, simulator motion, and truck driving experience on steering of an articulated tractor-semitrailer combination	Netherlands	Cognitive Robotics Dept, Faculty of Mechanical, Maritiem and Materials Engineering, Delft University of Technology; Dept of BioMechanical Engineering, Faculty of Mechanical, Maritime and Materials Engineering, Delft Univeristy of Technology; Control & Simulation, Faculty of Aerospace Engineering, Delft University of Technology; School of Communication, Media & IT, Hanze Univeristy of Applied Scie…	Peer review journal	Yes	JZ
Simon, K.; Jentsch, M.; Bullinger, A.C.; Meincke, E.; Schamber, G.	2015	Sicher aber langweilig? Auswirkungen vollautomatisierten Fahrens auf den erlebten Fahrspaß	Germany	Professur Arbeitswissenschaft und Innovationsmanagement, TU Chemnitz	Peer review journal	Yes	JZ
Smith, B. L.; Ma, J.; Park, H.	2015	Prototyping and evaluating a smartphone dynamic message sign (DMS) application	USA	Virginia Tech Transportation Institute (VTTI), University of Virginia (UVA) Center for Transportation Studies, and Morgan State University (MSU).	Report		JZ
Sokol, N.	2017	The effects ot noise-robustness of in-car voice controlled systems on user perceptions and driving behaviour	Canada	Graduate Dept of Mechanical and Industrial Engineering, University of Toronto	Doctorate or graduate thesis		JZ
Sokol, N.; Chen. H.; Donmez, B.	2017	Voice-Controlled In-Vehicle Systems: Effects of Voice-Recognition Accuracy in the Presence of Background Noise	Canada	Mechanical and Industrial Engineering, University of Toronto	Conference proceedings		JZ
Spyropoulou, I.K.; Karlaftis, M.G.; Reed, N.	2014	Intelligent Speed Adaptation and driving speed: Effects of different system HMI functionalities	UK	School of Rural and Surveying Engineering, Laboratory of Transportation Engineering, Athens; School of Civil Engineering, Dept of Transportation Planning and Engineering, National Technical University of Athens	Peer review journal	Yes	JZ
Stahl, P.; Donmez, B.; Jamieson, G.A.	2016	Supporting anticipation in driving through attentional and interpretational in-vehicle displays	Canada	Dept of Mechanical and Industrial Engineering, University of Toronto	Peer review journal	Yes	JZ
Staubach, M.; Schebitz, N.; Köster, F.; Kuck, D.	2014	Evaluation of an eco-driving support system	Germany	Institute of Transportation Systems, German Aerospace Center (DLR); Ford Forschungszentrum Aachen GmbH	Peer review journal	Yes	JZ
Staubach, M.; Schebitz, N.; Krehle, T.; Oeltze, K.; Kuck, D.	2013	User acceptance of an eco-driving support system	Germany	Institute of Transportation Systems, German Aerospace Center (DLR); Ford Forschungszentrum Aachen GmbH	Conference proceedings		LP, JZ
Stecher, M.; Michel, B.; Zimmermann, A.	2018	The Benefit of Touchless Gesture Control: An Empirical Evaluation of Commercial Vehicle-Related Use Cases	Germany	Chair of Ergonomics, Technical University of Munich MAN Truck & Bus AG, Munich	Monograph, book, book chapter		JZ
Themann, P.; Krajewski, R; Eckstein, L.	2014	Discrete Dynamic Optimization in Automated Driving Systems to Improve Engery Efficiency in Cooperative Networks	Germany	Institut für Kraftfahrzeuge, RWTH Aachen	Conference proceedings		JZ
Tijerina, L.; Blommer, M.; Curry, R.; Swaminathan, R.; Kochhar, D.; Talamonti	2016	An Exploratory Study of Driver Response to Reduced System Confidence Notifications in Automated Driving	USA*	Ford Motor Company Research and Advanced Engineering; Ford Research and Innovation Center	Peer review journal	Yes	JZ
Unselt, T.; Mayer, C.; Chin, E.; Aparicio, A.; Munoz, O.; Ranovonam M.; Tsuchida, J.; Winkler, B.	2011	Assessment of behavioral aspects in integrated safety systems	Germany; France; Spain; Belgium; Austria	Daimler AG; PSA-Peugeot-Citroen; Applus IDIADA Group; Toyota Motor Europe NV/SA; Technische Universität Graz	Conference proceedings		JZ
Urhahne, J.A.	2016	Who is driving my car? Development and analysis of a control transition strategy for collaborative automated congestion driving	Netherlands	University of Twente	Doctorate or graduate thesis	Yes	JZ
van Arem, B.; Driever, H.; Feenstra, P.; Klunder, G.; Kostense, H.; Papp, Z.; Ploeg, J.; Wilmink, I.	2007	Multi-aspect development and evaluation of intergrated full-range speed assistance	Netherlands	TNO, Delft	Conference proceedings		JZ
van den Beukel, A.P.; van der Voort, M.C.	2017	How to assess driver's interaction with partially automated driving systems - A framework for early concept assessment	Netherlands	University of Twente	Peer review journal	Yes	JZ
van den Beukel, A.P.; van der Voort, M.C.; Eger, A.O.	2016	Supporting the changing driver's task: Exploration of interface designs for supervision and intervention in automated driving	Netherlands	Human Centred Design Group, Enschede	Peer review journal	Yes	JZ
van der Pas, J.W.G.M.; Vlassenroot, S.H.; van Wee, B.; Witlox, F.	not dated	Intelligent Speed Adaptation: Slow speed, Slow Implementation?	Netherlands; Belgium	Delft University of Technology; Ghent University, Institute for Sustainable Mobility; Ghent University, Dept of Geography	Conference proceedings		JZ
van Driel, C.	2007	Driver support in congestion: an assessment of user needs and impacts on driver and traffic flow	Netherlands	Universiteit Twente	Doctorate or graduate thesis		JZ
van Driel, C.J.G.; Hoedemaeker, M.; van Arem, B.	2007	Impacts of a congestion assistant on driving behaviour and acceptance using a driving simulator	Netherlands	University of Twente, Centre for Transport Studies, Applications of Integrated Driver Assistance TNO Human Factors	Peer review journal	Yes	JZ
van Driel, C.J.G.; van Arem, B.	2007	Driver needs, acceptance and willingness to pay related to a congestion assistant	Netherlands	Centre for Transport Studies, University of Twente	Conference proceedings		JZ
van Driel, C.J.G.; van Arem, B.; van Zuyylen, H.J.	2006	Driver acceptance of a Congestion Assistant. Results from a driving simulator study	Netherlands	Faculty of Engineering Technology, Centre for Transport Studies, University of Twente	Conference proceedings		JZ
van Nes, N.; Brandenburg, S.; Twisk, D.	2010	Improving homogeneity by dynamic speed limit systems	Netherlands	SWOV Institute for Road Safety Research; Berlin Institute of Technology	Peer review journal	Yes	LP, JZ
Van Oosterhout, J.; Heemskerk, CJM; de Baar, M R; van der Helm, FCT; Abbink, D A	2018	Tele-Manipulation with two asymmetric slaves: two operators perform better than one	Netherlands	DIFFER and Department of BioMechanical Engineering, Delft University of Technology	Peer review journal	Yes	JZ
Várhelyi, A.; Adell, E.	2006	A comparative real life study of auditory and haptic systems for in-vehicle speed support	Sweden*	Dept of Technology and Society, Lund University, Sweden	Conference proceedings		JZ
Várhelyi, A.; Kaufmann, C.; Persson, A.	2015	User-related assessment of a Driver assistance System for Continuous Support - A field trial	Italy	Dept of Technology and Society, Lund University, Sweden	Peer review journal	Yes	JZ
Verberne, F.M.F.; Ham, J.; Midden, C.J.H.	2012	Trusting Automation Technology for Safer Roads: The Effect of Shared Driving Goals	Netherlands	Eindhoven University of Technology	Conference proceedings	Yes	JZ
Villing, J.	not dated	Evaluating promt design for an in-vehicle dialogue system	Sweden	Göteborg University	Unknown		JZ
Vlassenroot, S.	2004	Intelligent speed adaptation (ISA) in Ghent, Belgium: the first European trial with politicians, academics and car-constructors as role models in ISA-driving	Belgium	Centre for Sustainable Development, Ghent University	Monograph, book, book chapter		JZ
Vlassenroot, S.; Broekx, S.; De Mol, J.; Int Panis, L.; Brijs, T.; Wets, G.	2007	Driving with intelligent speed adaptation: Final results of the Belgian ISA-trial	Belgium	Institute for Sustainable Mobility, Ghent University; Flemish Institute for Technological research; Transportation Research Institute, Hasselt University	Peer review journal	Yes	JZ
Vlassenroot, S.; Brookhuis, K.	2014	Socio-Psychological Factors That Influence Acceptability of Intelligent Transport Systems: A Model	Belgium; Netherlands	Flanders Institute for Mobility, Ghent Univertsity; Delft University of Technology; University of Groningen	Monograph, book, book chapter		JZ
Vlassenroot, S.; Brookhuis, K.; De Mol, J.; Marchau, V.; Witlox, F.	2011	Acceptability of ISA: Results from a large scale survey in Belgium and the Netherlands	Netherlands; Belgium	Institute for Sustainable Mobility, Ghent University; Section Transport Policy and Logistics' Organisation, Delft University of Technology; Dept of Psychology, University of Groningen; Department of Geography, Ghent University	Conference proceedings		JZ
Vlassenroot, S.; Brookhuis, K.; Marchau, V.; Witlox, F.	2010	Towards defining a unified concept for the acceptability of Intelligent Transport Systems (ITS): A conceptual analysis based on the case of Intelligent Speed Adaptation (ISA)	Belgium; Netherlands	Transport Policy and Logistics Organisation, Delft University of Technology, The Netherlands Institute for Sustainable Mobility (IDM), Ghent University, Belgium Department of Psychology, University of Groningen, The Netherlands Department of Geography, Ghent University, Belgium	Peer review journal	Yes	JZ
Vlassenroot, S.; De Mol, J.	2004	Trial on intelligent speed adaptation in Ghent, Belgium: the results on acceptance and driving-behaviour of the test	Belgium	Ghent University	Conference proceedings		JZ
Vlassenroot, S.; De Mol, J.	2005	The Acceptance of Intelligent Speed Adaptation (ISA) and the Use of Role-models: A Strategic Procedure in Implementation of Speed -warning Devices	Belgium	Ghent University	Conference proceedings		BF
Vlassenroot, S.; De Mol, J.; Brookhuis, K.; Marchau, V.; Witlox, F.	2010	Intelligent Speed Adaptation: From Trial Support to Public Support	Belgium	Ghent University; Steunpunt Mobiliteit & Openbare Werken, Spoor Verkeersveiligheid	Report		BF, JZ
Vlassenroot, S.; De Mol, J.; Marchau, V.; Brookhuis, K.; Witlox, F.	2010	Acceptability of Intelligent Speed Adaptation (ISA): conceptual framework and first results	Belgium	Ghent University Steunpunt Mobiliteit & Openbare Werken	Report		JZ
Wallén Warner, H.	2006	How does the use of ISA affect drivers’ attitude towards the system?	Sweden	Dalarna University, Sweden	Conference proceedings		JZ
Wang, M.J.; Duan, L.; Wang, J.X.; Sun, D.; Chen, F.	2016	Drive Advisory System: Do Swedish and Chinese Drivers Appreciate It in the Same Way?	China, Sweden	Division of Interaction Design and Technology, Institute of Apply IT, Chalmers University; Safety Research, Institute of Automobile, Tongji University	Peer review journal	Yes	LK, JZ
Wang, M.J.; Lyckvi, S.L.; Hong, C.; Dahlstedt, P.; Chen, F.	2017	Using Advisory 3D Sound Cues to Improve Drivers’ Performance and Situation Awareness	Sweden	Interaction Design, Department of Applied IT; Systems, Control and Mechatronics, Department of Signals and Systems Chalmers University of technology, Gothenburg, Sweden; University of Gothenburg, Sweden	Conference proceedings	Yes	LK, JZ
Will, C.; Schuller, A.	2016	Understanding user acceptance factors of electric vehicle smart charging	Germany	FZI - Research Center for Information Technology; Karlsruhe Institute of Technology	Peer review journal	Yes	LK, JZ
Wilschut, E.S.; Feenstra, P.J.	2010	Evaluation of different modalities for the intelligent cooperative intersection safety system (IRIS) and speed limit system	Netherlands	TNO Human Factors, Soesterberg	Conference proceedings		JZ
Wilschut, E.S.; Willemsen, D.M.C.; Hogema, J.H.; Martens, M.H.	2016	Adaptive Virtual Tow Bar and Transition of Control: A truck driving simulator study	Netherlands	TNO Soesterberg	Report		JZ
Winkler, S.; Kazazi, J.; Vollrath, M.	2018	Practice makes better - Learning effects of driving with a multi-stage collision warning	Germany	Dept of Engineering and Traffic Psychology, TU Braunschweig	Peer review journal	Yes	JZ
Woerndl, W.; Huebner, W.; Bader, R.; Vico, D.G.	2011	A Model for Proactivity in Mobile, Context-aware Recommender Systems	Germany; Spain	TU München; BMW Group Research & Technology; Universidad Politécnica de Madrid	Conference proceedings		JZ
Wolter, S.	2017	Subjective Evaluation of Driver Assistance Systems in an International Sample	Germany	Mathematisch-Naturwissenschaftliche Fakultät, Heinrich-Heine-Universität	Doctorate or graduate thesis	Yes	JZ
Xie, J. Y.	2016	Gaming to Safety: The Design and Evaluation of Feedback Gamification for Mitigating Driver Distraction	Canada	Department of Mechanical & Industrial Engineering University of Toronto	Doctorate or graduate thesis		JZ
Young, K.L.; Regan, M.A.; Triggs, T.J.; Jontof-Hutter, K.; Newstead, S.	2010	Intelligent speed Adaptation - Effects and acceptance by young inexperienced drivers	Australia	Monash University Accident Research Centre	Peer review journal	Yes	JZ
Zhao, G.; Wu, C.	2013	Effectiveness and acceptance of the intelligent speeding prediction system (ISPS)	USA	State University of New York; Institute of Psychology, Chinese Academy of Sciences	Peer review journal	Yes	JZ, LP
